# Supplementary material for: Robust Metabolite Quantification from J-Compensated 2D 1H-13C-HSQC Experiments
Source: PubMed Central journal article supplement (PMC7695005; doi:10.3390/metabo10110449), 2020-11-07
Supplement: metabolites-10-00449-s001.pdf [file metabolites-10-00449-s001.pdf]

# Supplemental Material: Robust Metabolite Quantification from J-Compensated 2D $^1\text{H}$ - $^{13}\text{C}$ -HSQC Experiments

Alexander Weitzel<sup>1,†</sup>, Claudia Samol<sup>1</sup>, Peter J. Oefner<sup>1</sup>, and Wolfram  
Gronwald<sup>1,\*</sup>

<sup>1</sup>Institute of Functional Genomics, University of Regensburg

\*Correspondence: wolfram.gronwald@klinik.uni-regensburg.de

†Current address: Institute of Experimental and Applied Physics, Regensburg

November 6, 2020

# S1 Experimental Details

## S1.1 Spectrometer Software

We used *Bruker TopSpin 3.1 PL7* for the control of the spectrometer. The pulse sequence *hsqcetgppr*, which is included in *Bruker TopSpin 3.1 PL7*, was used in an altered version by addition of continuous wave presaturation to determine calibration factors and was later used to examine the samples by means of standard HSQC. For the Q-HSQC, we extended this pulse program such that 75 % of scans are acquired with an INEPT delay of  $\Delta_1 = 2.94$  ms and 25 % of the scans with an INEPT delay of  $\Delta_2 = 5.92$  ms. Furthermore, we replaced the composite  $^{13}\text{C}$  inversion pulses by adiabatic inversion pulses of the type *Crp60,0.5,20.1*. This allows the uniform excitation of a larger spectral window of the  $^{13}\text{C}$  frequencies. For the QUIPU-HSQC we adapted the pulse sequence established by Mauve *et al.* [1] and replaced the looped solvent inversion by continuous wave presaturation, for which we optimized the offset prior to experiments. Additionally, just as for Q-HSQC, we replaced the composite  $^{13}\text{C}$  inversion pulses by adiabatic inversion pulses of the type *Crp60,0.5,20.1*. For each experiment 8 scans were collected in 128 increments.

## S1.2 Sample Details

Table S1: Concentration levels of the spiked-in compounds per sample.

| sample | acetic acid | alanine | betaine | citric acid | creatinine | ethanol-glycine amine | histidine | taurine | TMAO  |       |
|--------|-------------|---------|---------|-------------|------------|-----------------------|-----------|---------|-------|-------|
| 1      | 0.010       | 0.020   | 0.039   | 0.078       | 0.156      | 0.312                 | 0.624     | 1.248   | 2.496 | 4.992 |
| 2      | 0.020       | 0.039   | 0.078   | 0.156       | 0.312      | 0.624                 | 1.248     | 2.496   | 4.992 | 0.010 |
| 3      | 0.039       | 0.078   | 0.156   | 0.312       | 0.624      | 1.248                 | 2.496     | 4.992   | 0.010 | 0.020 |
| 4      | 0.078       | 0.156   | 0.312   | 0.624       | 1.248      | 2.496                 | 4.992     | 0.010   | 0.020 | 0.039 |
| 5      | 0.156       | 0.312   | 0.624   | 1.248       | 2.496      | 4.992                 | 0.010     | 0.020   | 0.039 | 0.078 |
| 6      | 0.312       | 0.624   | 1.248   | 2.496       | 4.992      | 0.010                 | 0.020     | 0.039   | 0.078 | 0.156 |
| 7      | 0.624       | 1.248   | 2.496   | 4.992       | 0.010      | 0.020                 | 0.039     | 0.078   | 0.156 | 0.312 |
| 8      | 1.248       | 2.496   | 4.992   | 0.010       | 0.020      | 0.039                 | 0.078     | 0.156   | 0.312 | 0.624 |
| 9      | 2.496       | 4.992   | 0.010   | 0.020       | 0.039      | 0.078                 | 0.156     | 0.312   | 0.624 | 1.248 |
| 10     | 4.992       | 0.010   | 0.020   | 0.039       | 0.078      | 0.156                 | 0.312     | 0.624   | 1.248 | 2.496 |

Table S2: Signal properties of the ten test metabolites.

| Metabolite   | Signal              | $^{13}\text{C}$ chemical shift [ppm] | $^1\text{H}$ chemical shift [ppm] | $J_{\text{CH}}$ [Hz] | calibration factor |
|--------------|---------------------|--------------------------------------|-----------------------------------|----------------------|--------------------|
| Acetic acid  | C2 H2A/H2B/H2C      | 25.91                                | 1.90                              | 126.5                | 12.60              |
| Alanine      | C2 H2               | 53.31                                | 3.76                              | 140.7                | -                  |
|              | C3 H3A/H3B/H3C      | 18.81                                | 1.46                              | 119.8                | 27.66              |
| Betaine      | C2 H2A/H2B          | 68.76                                | 3.88                              | 140.5                | 25.41              |
|              | C4/C5/C6 methylated | 55.92                                | 3.23                              | 147.5                | 26.98              |
| Citric acid  | C2/C4 H2A/H4A       | 48.26                                | 2.53                              | 126.0                | 30.12              |
|              | C2/C4 H2B/H4B       | 48.29                                | 2.64                              | 127.1                | 30.12              |
| Creatinine   | C2 H2A H2B          | 59.07                                | 4.03                              | 141.3                | 26.98              |
|              | C6 H6A/H6B/H6C      | 32.57                                | 3.05                              | 133.7                | 22.97              |
| Ethanolamine | C1 H1A/H1B          | 60.42                                | 3.80                              | 144.4                | 25.13              |
|              | C2 H2A/H2B          | 44.10                                | 3.12                              | 140.1                | 23.47              |
| Glycine      | C2 H2A/H2B          | 44.24                                | 3.54                              | 144.3                | 24.15              |
| Histidine    | C2 H2               | 57.48                                | 3.96                              | 140.8                | -                  |
|              | C3 H3A              | 30.51                                | 3.22                              | 128.3                | -                  |
|              | C3 H3B              | 30.62                                | 3.17                              | 117.4                | -                  |
|              | C5 H5               | 119.58                               | 7.06                              | 193.4                | 23.55              |
| Taurine      | C7 H7               | 138.75                               | 7.83                              | 211.4                | -                  |
|              | C1 H1A/B            | 38.18                                | 3.40                              | 142.1                | 27.55              |
|              | C2 H2A/B            | 50.09                                | 3.23                              | 133.9                | 25.47              |
| TMAO         | C1/C2/C3 methylated | 62.15                                | 3.25                              | 141.6                | 27.48              |

## S2 Supplemental Results

### S2.1 Relative errors and relative standard deviations

Table S3: Relative errors (RE) and relative standard deviations (RSD) obtained by the standard HSQC. The true value was assumed to be the concentration value obtained by means of 1D  $^1\text{H}$  NMR. The RE was then calculated as the difference between the concentration value obtained by standard HSQC and the true concentration value divided by the true concentration value. The concentration estimates were each averaged over the number of experiments (3), if possible. In case the compound was detected in only one or two of the measurements of a triplicate, the corresponding mean value of the two incidents or the single value was used.

| conc. level | alanine |      | creatinine |       | glycine |      | taurine |      | betaine |      | acetic acid |      | ethanol-amine |      | TMAO  |       | histidine |      | citric acid |      |
|-------------|---------|------|------------|-------|---------|------|---------|------|---------|------|-------------|------|---------------|------|-------|-------|-----------|------|-------------|------|
|             | RE      | RSD  | RE         | RSD   | RE      | RSD  | RE      | RSD  | RE      | RSD  | RE          | RSD  | RE            | RSD  | RE    | RSD   | RE        | RSD  | RE          | RSD  |
| 1           | -       | -    | -          | -     | -       | -    | -       | -    | -       | -    | -           | -    | -             | -    | -     | -     | -         | -    | -           | -    |
| 2           | -       | -    | -          | -     | -       | -    | -       | -    | -       | -    | -           | -    | -             | -    | -     | -     | -         | -    | -           | -    |
| 3           | -       | -    | -          | -     | -       | -    | -       | -    | -       | -    | -           | -    | -             | -    | -     | -     | -         | -    | -           | -    |
| 4           | 0.19    | 0.07 | 0.08       | -     | 0.03    | -    | 0.16    | -    | 0.19    | 0.06 | 0.70        | -    | 0.05          | -    | 0.28  | 0.17  | -         | -    | -           | 0.23 |
| 5           | 0.19    | 0.15 | 0.03       | 0.07  | 0.01    | 0.36 | 0.03    | 0.09 | 0.06    | 0.07 | 0.15        | 0.10 | 0.06          | -    | 0.26  | 0.05  | 0.40      | -    | 0.18        | 0.27 |
| 6           | 0.11    | 0.02 | 0.01       | 0.05  | 0.04    | 0.10 | 0.06    | 0.12 | 0.02    | 0.02 | 0.23        | 0.08 | 0.02          | 0.09 | 0.14  | 0.01  | 0.02      | 0.08 | 0.02        | 0.12 |
| 7           | 0.10    | 0.02 | 0.05       | 0.03  | 0.08    | 0.05 | 0.06    | 0.03 | 0.04    | 0.01 | 0.08        | 0.07 | 0.06          | 0.07 | 0.15  | 0.02  | 0.04      | 0.03 | 0.02        | 0.07 |
| 8           | 0.06    | 0.01 | 0.01       | 0.03  | 0.06    | 0.03 | 0.02    | 0.01 | 3E-4    | 0.02 | 0.08        | 0.03 | 0.06          | 0.01 | 0.004 | 0.01  | 0.06      | 0.03 | 0.04        | 0.03 |
| 9           | 0.03    | 0.01 | 0.003      | 0.03  | 0.02    | 0.03 | 0.02    | 0.01 | 0.05    | 0.01 | 0.13        | 0.02 | 0.09          | 0.01 | 0.02  | 0.002 | 0.01      | 0.01 | 0.06        | 0.01 |
| 10          | 0.04    | 0.01 | 0.02       | 0.002 | 0.003   | 0.01 | 0.01    | 0.01 | 0.04    | 3E-4 | 0.11        | 0.01 | 0.09          | 0.01 | 1E-4  | 0.003 | 0.02      | 0.02 | 0.06        | 0.01 |

Table S4: Relative errors (RE) and relative standard deviations (RSD) obtained by the Q-HSQC. The true value was assumed to be the concentration value obtained by means of 1D  $^1\text{H}$  NMR. The RE was then calculated as the difference between the concentration value obtained by Q-HSQC and the true concentration value divided by the true concentration value. The concentration estimates were each averaged over the number of experiments (3), if possible. In case the compound was detected in only one or two of the measurements of a triplicate, the corresponding mean value of the two incidents or the single value was used.

| conc. level | alanine |      | creatinine |      | glycine |       | taurine |       | betaine |       | acetic acid |      | ethanol-amine |      | TMAO |       | histidine |      | citric acid |      |
|-------------|---------|------|------------|------|---------|-------|---------|-------|---------|-------|-------------|------|---------------|------|------|-------|-----------|------|-------------|------|
|             | RE      | RSD  | RE         | RSD  | RE      | RSD   | RE      | RSD   | RE      | RSD   | RE          | RSD  | RE            | RSD  | RE   | RSD   | RE        | RSD  | RE          | RSD  |
| 1           | -       | -    | -          | -    | -       | -     | -       | -     | -       | -     | -           | -    | -             | -    | -    | -     | -         | -    | -           | -    |
| 2           | -       | -    | -          | -    | -       | -     | -       | -     | -       | 0.16  | -           | -    | -             | -    | -    | -     | -         | -    | -           | -    |
| 3           | -       | -    | 0.45       | -    | -       | -     | -       | -     | -       | 0.003 | -           | -    | -             | -    | 0.07 | 0.24  | -         | -    | -           | -    |
| 4           | 0.05    | 0.19 | 0.08       | 0.08 | 0.55    | -     | -       | -     | 0.18    | 0.10  | 0.22        | 0.04 | 0.07          | -    | 0.59 | 0.11  | -         | -    | 1.23        | -    |
| 5           | 0.17    | 0.01 | 0.03       | 0.11 | 0.01    | 0.03  | 0.04    | 0.12  | 0.06    | 0.02  | 0.25        | 0.18 | 0.15          | 0.07 | 0.44 | 0.07  | 0.51      | -    | 0.41        | -    |
| 6           | 0.003   | 0.14 | 0.07       | 0.06 | 0.12    | 0.01  | 0.02    | 0.06  | 0.04    | 0.03  | 0.27        | 0.03 | 0.09          | 0.07 | 0.32 | 0.04  | 0.04      | 0.10 | 0.002       | 0.01 |
| 7           | 0.02    | 0.03 | 0.06       | 0.04 | 0.05    | 0.03  | 0.07    | 0.002 | 0.10    | 0.01  | 0.26        | 0.09 | 0.16          | 0.02 | 0.28 | 0.02  | 0.15      | 0.06 | 0.01        | 0.11 |
| 8           | 0.04    | 0.01 | 0.13       | 0.01 | 0.01    | 0.01  | 0.10    | 0.01  | 0.08    | 0.02  | 0.25        | 0.03 | 0.15          | 0.05 | 0.13 | 0.002 | 0.22      | 0.01 | 0.002       | 0.01 |
| 9           | 0.05    | 0.02 | 0.09       | 0.01 | 0.05    | 0.01  | 0.10    | 0.01  | 0.14    | 0.003 | 0.24        | 0.02 | 0.22          | 0.01 | 0.12 | 0.002 | 0.22      | 0.02 | 0.01        | 0.01 |
| 10          | 0.06    | 0.01 | 0.08       | 0.01 | 0.06    | 0.002 | 0.11    | 0.003 | 0.12    | 0.01  | 0.24        | 0.01 | 0.18          | 0.01 | 0.13 | 1E-   | 0.14      | 0.01 | 0.01        | 0.01 |

Table S5: Relative errors (RE) and relative standard deviations (RSD) obtained by the QUIPU-HSQC. The true value was assumed to be the concentration value obtained by means of 1D  $^1\text{H}$  NMR. The RE was then calculated as the difference between the concentration value obtained by QUIPU-HSQC and the true concentration value divided by the true concentration value. The concentration estimates were each averaged over the number of experiments (3), if possible. In case the compound was detected in only one or two of the measurements of a triplicate, the corresponding mean value of the two incidents or the single value was used.

| conc. level | alanine |      | creatinine |      | glycine |      | taurine |      | betaine |      | acetic acid |      | ethanol-amine |      | TMAO |      | histidine |      | citric acid |      |
|-------------|---------|------|------------|------|---------|------|---------|------|---------|------|-------------|------|---------------|------|------|------|-----------|------|-------------|------|
|             | RE      | RSD  | RE         | RSD  | RE      | RSD  | RE      | RSD  | RE      | RSD  | RE          | RSD  | RE            | RSD  | RE   | RSD  | RE        | RSD  | RE          | RSD  |
| 1           | -       | -    | 29.15      | -    | -       | -    | 46.80   | -    | 32.46   | -    | -           | -    | 54.12         | 0.34 | -    | -    | -         | -    | -           | -    |
| 2           | -       | -    | 10.56      | -    | 13.95   | -    | 15.94   | -    | 39.84   | -    | -           | -    | 32.77         | -    | -    | -    | 16.35     | -    | 14.25       | -    |
| 3           | 2.95    | -    | -          | -    | 15.09   | -    | 12.84   | -    | 3.62    | 0.25 | -           | -    | 16.32         | 0.47 | 2.84 | -    | -         | -    | 11.25       | -    |
| 4           | -       | -    | 0.78       | -    | 1.72    | -    | 4.46    | 0.29 | 2.95    | 0.44 | -           | -    | 5.07          | -    | 3.00 | -    | 7.87      | -    | -           | -    |
| 5           | 0.23    | 0.08 | 0.40       | 0.60 | 1.80    | -    | 3.12    | 0.22 | 0.27    | 0.24 | 0.30        | -    | 1.45          | -    | 0.85 | 0.29 | 5.07      | -    | 0.58        | -    |
| 6           | 0.002   | 0.24 | 0.04       | 0.13 | 0.10    | -    | 0.42    | 0.17 | 0.33    | 0.08 | 0.03        | 0.56 | 1.74          | 0.53 | 0.69 | 0.10 | 1.23      | -    | 0.23        | -    |
| 7           | 0.06    | 0.10 | 0.14       | 0.21 | 0.46    | 0.55 | 0.07    | 0.10 | 0.32    | 0.05 | 0.05        | 0.25 | 0.05          | 0.08 | 0.45 | 0.10 | 0.02      | 0.33 | 0.05        | 0.19 |
| 8           | 0.02    | 0.01 | 0.06       | 0.04 | 0.003   | 0.18 | 4E-     | 0.17 | 0.10    | 0.08 | 0.26        | 0.02 | 0.09          | 0.06 | 0.15 | 0.05 | 0.34      | 0.10 | 0.18        | 0.16 |
| 9           | 0.02    | 0.06 | 0.01       | 0.02 | 0.04    | 0.02 | 0.03    | 0.10 | 0.14    | 0.01 | 0.26        | 0.05 | 0.15          | 0.13 | 0.12 | 0.04 | 0.36      | 0.20 | 0.16        | 0.03 |
| 10          | 0.04    | 0.03 | 0.09       | 0.02 | 0.02    | 0.02 | 0.06    | 0.03 | 0.04    | 0.01 | 0.25        | 0.01 | 0.15          | 0.03 | 0.18 | 0.02 | 0.39      | 0.19 | 0.12        | 0.05 |

## S2.2 Friedman and Nemenyi tests on relative errors and relative standard deviations

Table S6: Results of a Nemenyi post-hoc test performed on the relative errors (REs) and relative standard deviations (RSDs) of standard HSQC, Q-HSQC and QUIPU-HSQC computed over all metabolites. Note that the preceding Friedman test resulted in significant results for both REs and RSDs  $p < 0.05$ .

|            | standard HSQC     |                      | Q-HSQC |                      |
|------------|-------------------|----------------------|--------|----------------------|
|            | RE                | RSD                  | RE     | RSD                  |
| Q HSQC     | 0.043             | 0.370                | -      | -                    |
| QUIPU HSQC | $5 \cdot 10^{-7}$ | $2.6 \cdot 10^{-14}$ | 0.013  | $1.0 \cdot 10^{-12}$ |

Table S7: Results of Friedman and Nemenyi post-hoc tests performed on the relative errors (REs) and relative standard deviations (RSDs) of individual metabolites computed for standard HSQC (St), Q-HSQC (Q) and QUIPU-HSQC (QU).

|               | Friedman |       | Nemenyi |        |       |       |        |       |
|---------------|----------|-------|---------|--------|-------|-------|--------|-------|
|               | RE       | RSD   | RE      |        |       | RSD   |        |       |
|               |          |       | St-Q    | St-QU  | Q-QU  | St-Q  | St-QU  | Q-QU  |
| alanine       | 0.223    | 0.069 | 0.970   | 0.900  | 0.970 | 0.173 | 0.001  | 0.173 |
| creatinine    | 0.018    | 0.042 | 0.110   | 0.110  | 1.000 | 0.781 | 0.002  | 0.020 |
| glycine       | 0.180    | 0.039 | 0.110   | 0.370  | 0.780 | 0.781 | 0.020  | 0.002 |
| taurine       | 0.135    | 0.006 | 0.037   | 0.644  | 0.261 | 1.000 | 0.020  | 0.020 |
| betaine       | 0.008    | 0.005 | 0.896   | 0.065  | 0.173 | 0.503 | 0.001  | 0.037 |
| acetic acid   | 0.135    | 0.247 | 0.170   | 0.010  | 0.500 | 0.896 | 0.010  | 0.037 |
| ethanol-amine | 0.018    | 0.015 | 0.01    | 0.500  | 0.170 | 1.000 | 0.110  | 0.110 |
| TMAO          | 0.002    | 0.009 | 0.109   | 0.0002 | 0.109 | 0.896 | 0.001  | 0.005 |
| histidine     | 0.030    | 0.050 | 0.065   | 0.037  | 0.973 | 0.372 | 0.0002 | 0.020 |
| citric acid   | 0.006    | 0.050 | 1.000   | 0.110  | 0.110 | 0.644 | 0.0004 | 0.010 |

## S2.3 Urine spike-in

Table S8: 21 amino acids were added at two different concentrations to a sample of human urine to analyze the performance of the Q-HSQC in a real world setting. Note that the first line contains the values determined in the blank sample, while the the next two lines contain the values obtained by Q-HSQC after subtraction of blank values. Note some of the blank values were in the low  $\mu\text{M}$  range and, therefore, not amenable by 2D NMR. Consequently, all blank values were determined by 1D NMR employing the Chenomx 8.6 software suite (Chenomx Inc., Edmonton, Canada).

| mM  | Ala   | Arg   | Asn   | Asp   | Glu   | Gln   | Gly   | Hipp  | His   | Ile   | Leu   | Lys   | Met   | Orn   | Phe   | Pro   | Ser   | Thr   | Trp   | Tyr   | Val   |
|-----|-------|-------|-------|-------|-------|-------|-------|-------|-------|-------|-------|-------|-------|-------|-------|-------|-------|-------|-------|-------|-------|
| 0.0 | 0.080 | 0.102 | 0.022 | 0.033 | 0.138 | 0.187 | 0.114 | 1.596 | 0.013 | 0.009 | 0.008 | 0.015 | 0.012 | 0.040 | 0.585 | 0.106 | 0.125 | 0.078 | 0.015 | 0.032 | 0.014 |
| 0.3 | 0.267 | 0.229 | 0.315 | 0.591 | 0.287 | 0.309 | 0.314 | 0.340 | 0.254 | 0.273 | 0.333 | 0.249 | 0.263 | 0.222 | 0.291 | -     | 0.586 | 0.205 | 0.384 | 0.430 | 0.242 |
| 0.6 | 0.581 | 0.569 | 0.616 | 0.571 | 0.534 | 0.552 | 0.577 | 0.682 | 0.773 | 0.600 | 0.754 | 0.549 | 0.564 | 0.652 | 0.686 | 0.521 | 0.712 | 0.437 | 0.678 | 0.695 | 0.581 |

## References

1. Mauve, C.; Khelifi, S.; Gilard, F.; Mouille, G.; Farjon, J. Sensitive, highly resolved, and quantitative  $1\text{H}$ - $^{13}\text{C}$  NMR data in one go for tracking metabolites in vegetal extracts. *Chemical Communications* **2016**, 52, 6142–6145.
